# Supplementary material for: A missense mutation in the barley Xan-h gene encoding the Mg-chelatase subunit I leads to a viable pale green line with reduced daily transpiration rate
Source: Plant Cell Rep. 2024 Sep 29;43(10):246. doi: 10.1007/s00299-024-03328-2 (PMC11439855; doi:10.1007/s00299-024-03328-2)
Supplement: Supplementary file 2 — Supplementary file2 (XLSX 23 KB) [file 299_2024_3328_MOESM2_ESM.xlsx]

## Sheet: Primer sequences
Oligonucleotide sequences
Locus	Gene	Sense primer (5' to 3')	Antisense primer (5' to 3')	Use	Nucleotide added at 5' end
HORVU.MOREX.r3.7HG0738240	Xan-h	GATGTTCTGCTGGATTCTGC	GACAATGTCTCCTCTGAGTCC	Genotyping of TM2490 and Chlorina125 alleles
HORVU.MOREX.r3.7HG0738240	Xan-h	TCAACGTCATCGACCCCAAG	GCAGAATCCAGCAGAACATC	Genotyping of Chlorina161 and Xantha.h156 alleles
HORVU.MOREX.r3.7HG0738240	Xan-h	*ATGGCCATGGCCTCCCCATTC	**CTAGCCAAAGACTTCATAGAAC	Atchli1 complementation with Hv_CHLI CDS	attB sites for Gateway cloning (see * and **)
HORVU.MOREX.r3.7HG0738240	Xan-h	TGTGGAGGAGAAGGCTCGGTTCG	ATCTTCACCCTCAGCTCGGC	Wild-type to TM2490 mutagenesis, E. coli codon usage
HORVU.MOREX.r3.7HG0738240	Xan-h	TGACCTGCCGTTCGGTGCGACCG	ACCATGGTGATTTTGGTGGTGG	Wild-type to Chlorina161 mutagenesis, E. coli codon usage
HORVU.MOREX.r3.7HG0738240	Xan-h	GCAGCTGCTGAACCGTTTTGGTATG	GGACGCAGCTCGCCTTCC	Wild-type to Chlorina125 mutagenesis, E. coli codon usage
HORVU.MOREX.r3.7HG0738240	Xan-h	TGACGGTCTGAAAGGCGATATTGTGAC	ACGTTCAGTTCGCTGCAC	Wild-type to Chlorina157 mutagenesis, E. coli codon usage
HORVU.MOREX.r3.7HG0738240	Xan-h	*CGGCGGCGAAGGAGAGCCAG	**TAGCCAAACCCTTTGTAG	Yeast two hybrid, E. coli codon usage	attB sites for Gateway cloning (see * and **)
AT4G18480	At_CHLI1	AAAGAAGAGTGCGAGACCGG	CAAACCAGGCTCAAAGGCTT	Genotyping of AtCHLI1 allele
AT4G18480	At_CHLI1	AAAGAAGAGTGCGAGACCGG	CTGAATTTCATAACCAATCTCGATACAC	Genotyping of Atchli1 allele
At5g54270	At_Lhcb3	TCTCCCAAGTACACTATGGG	TCTCCCAAGTACACTATGGG	REAL-TIME qPCR
At1g67090	At_RBCS	TATGGTCGCTCCTTTCAACG	TCCACTTGTTGCGGATAAGG	REAL-TIME qPCR
HORVU.MOREX.r3.2HG0135040	Hv_Lhcb3	GGGTCTTGTTGAAGGGTTCC	CGAAGAACCCGAACATAGAGAA	REAL-TIME qPCR
HORVU.MOREX.r3.2HG0104820	Hv_RBCS	GCAATGGCGGAAGGATCAGG	CCACTTGGAGCGGATCAGGT	REAL-TIME qPCR
attB sites	attB	GGGGACAAGTTTGTACAAAAAAGCAGGCT*	GGGGACCACTTTGTACAAGAAAGCTGGGT**	Gateway cloning
		*GGGGACAAGTTTGTACAAAAAAGCAGGCT	**GGGGACCACTTTGTACAAGAAAGCTGGGT

## Sheet: mutant lines
Locus	Gene	Allele	Line	Reference
AT4G18480	At_CHLI1	Atchli1	SAIL_230_D11	https://doi.org/10.1104/pp.109.135368
AT4G18480	At_CHLI1	cs	cs/cs	https://doi.org/10.1039/B802604C
HORVU.MOREX.r3.7HG0738240	Xan-h	xan-h.56	Xantha-h.56	https://doi.org/10.1016/j.plaphy.2014.02.004
HORVU.MOREX.r3.7HG0738240	Xan-h	xan-h.clo125	Chlorina125	https://doi.org/10.1073/pnas.96.4.1744
HORVU.MOREX.r3.7HG0738240	Xan-h	xan-h.clo157	Chlorina157	https://doi.org/10.1073/pnas.96.4.1744
HORVU.MOREX.r3.7HG0738240	Xan-h	xan-h.clo161	Chlorina161	https://doi.org/10.1073/pnas.96.4.1744
HORVU.MOREX.r3.7HG0738240	Xan-h	xan-h.chli-1	TM2490	This work
